# Supplementary material
Source: PubMed Central journal article supplement (PMC3424332)
Supplement: NIHMS391903-supplement-1.pdf [file NIHMS391903-supplement-1.pdf]

## **Supplemental Materials**

### **Resolvin D1 and Resolvin D2 Govern Local Inflammatory Tone in Obese Fat<sup>1</sup>**

Joan Clària<sup>2</sup>, Jesmond Dalli, Stephanie Yacoubian, Fei Gao and Charles N. Serhan<sup>3</sup>

Center for Experimental Therapeutics and Reperfusion Injury, Department of Anesthesiology, Perioperative and Pain Medicine, Brigham and Women's Hospital and Harvard Medical School, Boston, Massachusetts 02115

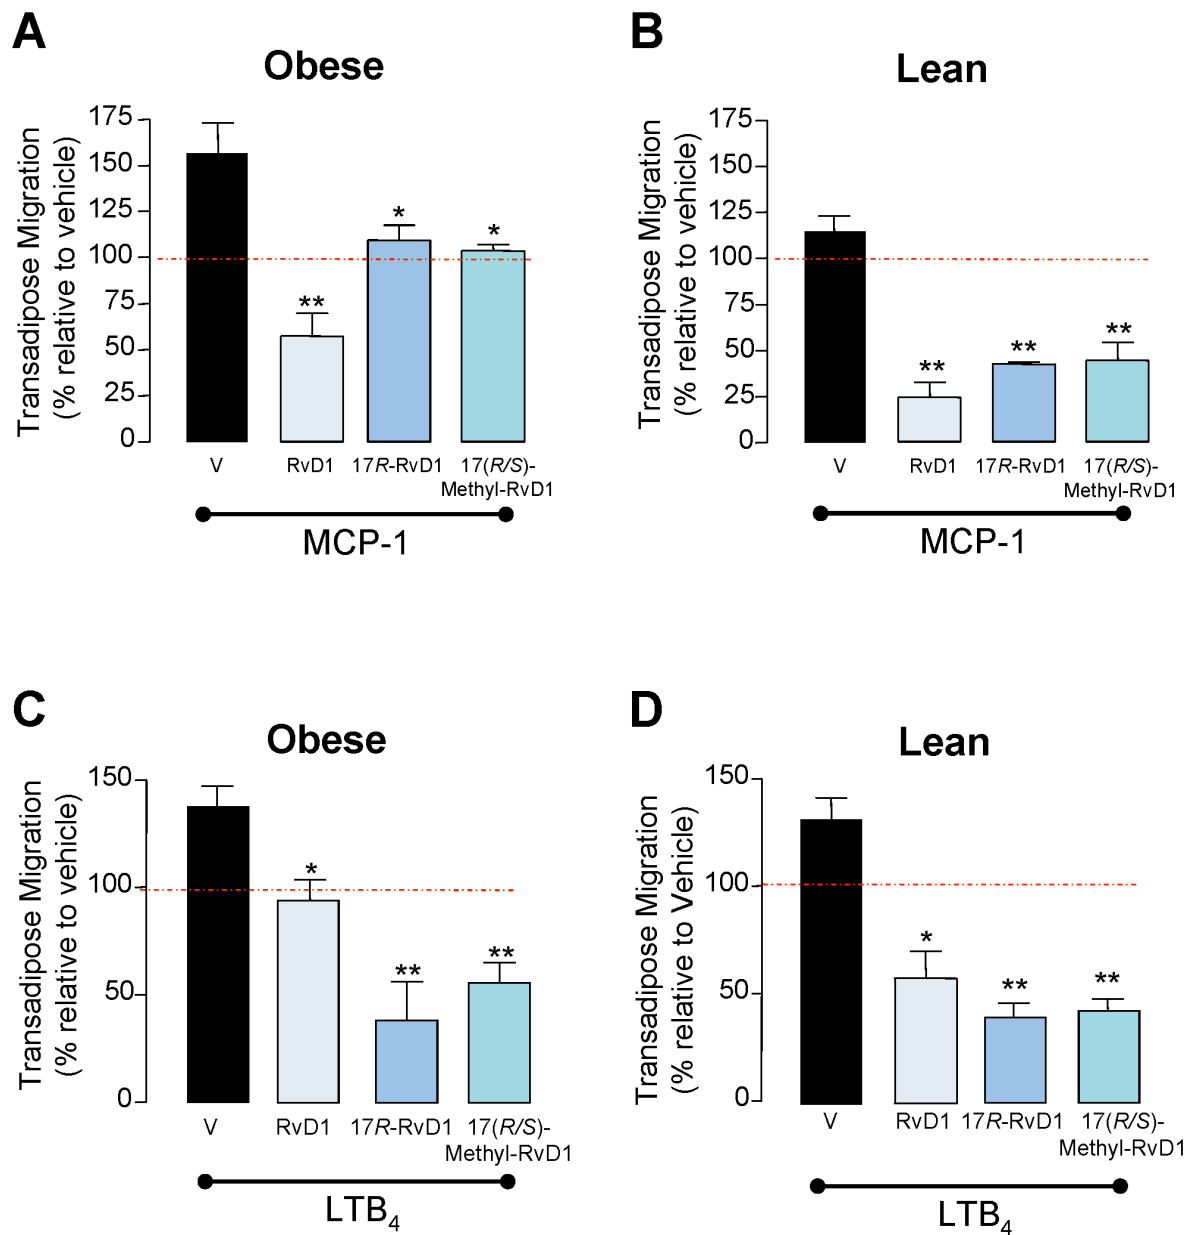

**Figure S1. 17R-RvD1 and 17(R/S)-Methyl-RvD1 are potent inhibitors of monocyte transadipose migration.** Murine adipocytes were loaded onto a 96-well ChemoTx® plate and either MCP-1 (15 ng/ml) or LTB<sub>4</sub> (10 nM) were added to the lower wells. Bone marrow-derived monocytes from either obese (A,C) or lean (B,D) mice were loaded on top of a 3 μm-pore size

filter in the presence of 10 nM of RvD1, 17R-RvD1 or 17(*R/S*)-Methyl-RvD1 and then co-incubated for 90 min at 37°C. The number of transmigrated monocytes was assessed by flow cytometry using anti-CD11b antibodies. Results represent the mean±SEM of 3 experiments assayed in triplicate. \*,  $P<0.05$  and \*\*,  $P<0.01$  versus cells receiving MCP-1 or LTB<sub>4</sub> alone.

**A****Human Monocyte Adhesion to Adipocytes**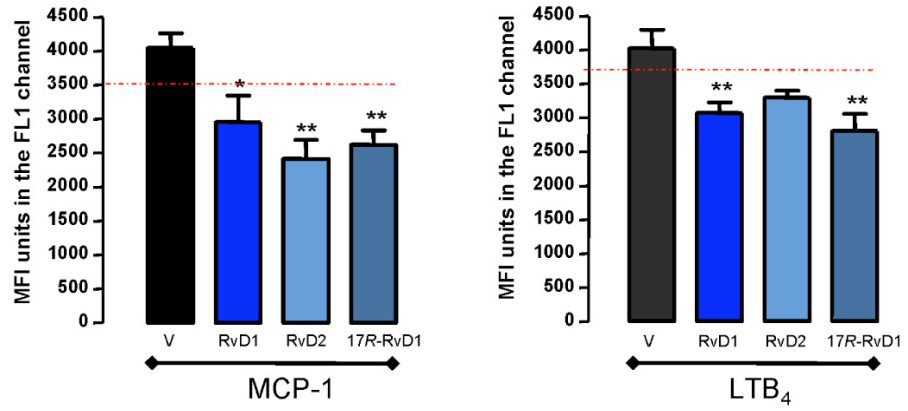**B****Human Monocyte Transadipose Migration**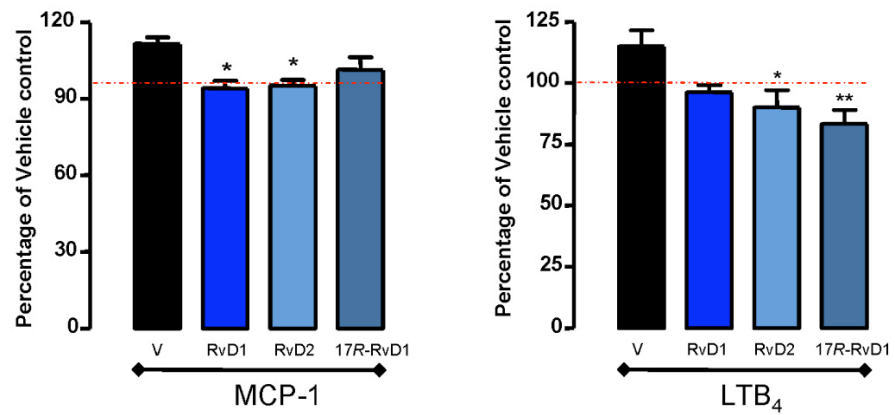**C**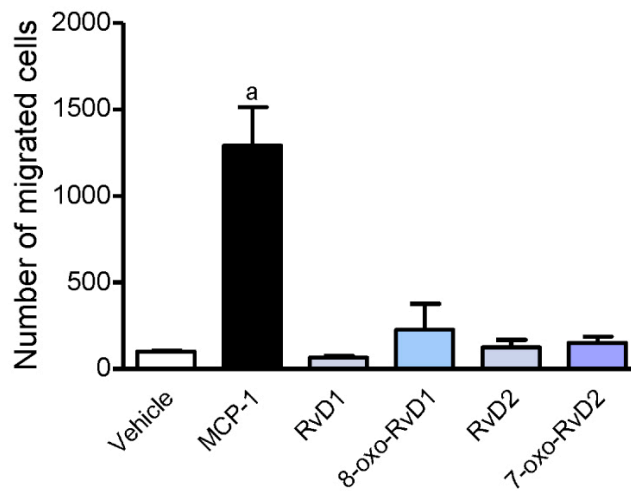

**Figure S2. Resolvins reduce human monocyte adhesion to human adipocytes and transadipose migration.** Human adipocytes were loaded onto a 96-well ChemoTx® plate and either MCP-1 (15 ng/ml) or LTB<sub>4</sub> (10 nM) were added to the lower wells. Peripheral blood monocytes were loaded on top of a 3 µm-pore size filter in the presence of 10 nM of RvD1, RvD2 or 17R-RvD1 and then co-incubated for 90 min at 37°C. The number of monocytes adhered to adipocytes (**A**) and the number of transmigrated monocytes (**B**) were assessed by flow cytometry using anti-perilipin and anti-CD11b antibodies. Results represent the mean±SEM of 3 experiments assayed in triplicate. \*,  $P<0.05$  and \*\*,  $P<0.01$  versus cells receiving MCP-1 or LTB<sub>4</sub> alone. (**C**) **RvD1, RvD2 and the oxo-containing RvD1 and RvD2 metabolites do not induce a chemotactic response in monocytes.** MCP-1, RvD1, 8-oxo-RvD1, RvD2 and 7-oxo-RvD2 were loaded in the bottom wells of the ChemoTx® plates and monocytes were loaded on top of the filter (3 µm pore size). Plates were then incubated (90 min, 37°C) and the number of transmigrated cells was assessed as described in Materials and Methods. *a*,  $P<0.005$  versus vehicle.
